# Supplementary material
Source: HighWire-hosted journal article supplement (https://www.g3journal.org/content/suppl/2017/06/06/g3.117.042127)
Supplement: Figure_S1.pdf [file Figure_S1.pdf]

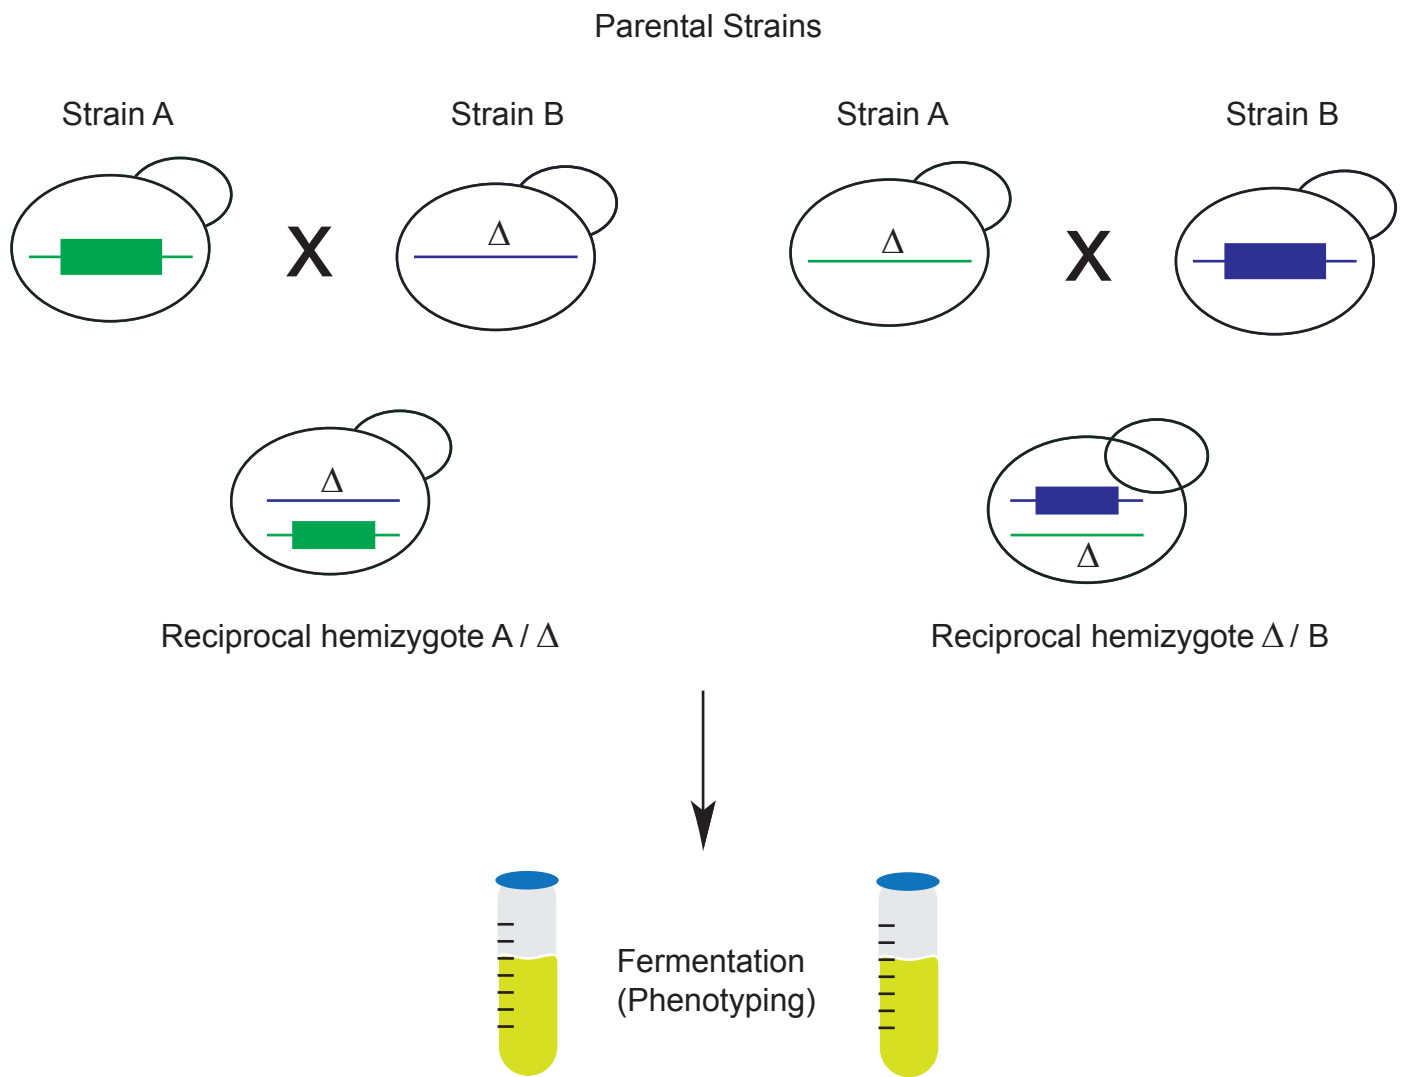

Figure S1
